# Supplementary material
Source: Oxford University Press journal article supplement (doi:10.1093/ecco-jcc_jjy224)
Supplement: jjy224_suppl_supplementary_table_1.docx [file jjy224_suppl_supplementary_table_1.docx]

| **Patient** | **Age (year)** | **Gender** | **Clinical presentation at the time of biopsy** | **Medication received at the time of biopsy** | **Sample location** |
| --- | --- | --- | --- | --- | --- |
| CC-patchy-1 | 46 | F | Chronic diarrhea | None | Random colon |
| CC-patchy-2 | 47 | F | Chronic diarrhea, abdominal pain | None | Random colon |
| CC-patchy-3 | 69 | F | Chronic diarrhea | Aspirin | Descending colon |
| CC-patchy-4 | 74 | F | Asymptomatic | Aspirin | Right colon |
| CC-patchy-5 | 69 | F | Chronic diarrhea | None | Descending colon |
| CC-diffuse-1 | 60 | F | Chronic diarrhea | Ibuprofen | Left colon |
| CC-diffuse-2 | 72 | F | Chronic diarrhea | Aspirin | Transverse colon |
| CC-diffuse-3 | 22 | F | Chronic diarrhea | None | Ascending colon |
| CC-diffuse-4 | 47 | F | Chronic diarrhea | Fluoxetine | Transverse colon |
| CC-diffuse-5 | 68 | M | Chronic diarrhea | None | Random colon |
| CC-diffuse-6 | 74 | F | Chronic diarrhea | None | Right colon |
| CC-diffuse-7 | 56 | M | N/A | N/A | Cecum |
| CC-diffuse-8 | 52 | F | Chronic diarrhea | None | Random colon |

**Supplement Table 1. Clinical characteristics of 13 patients with collagenous colitis. Abbreviations: M, male; F, female; N/A, not available.**
