# Supplementary material
Source: Oxford University Press journal article supplement (doi:10.1093/ecco-jcc_jjy224)
Supplement: jjy224_suppl_supplementary_table_2.docx [file jjy224_suppl_supplementary_table_2.docx]

| **Genes** | **Forward primer (5’-3’)** | **Reverse primer (5’-3’)** | **Amplicon size (bp)** |
| --- | --- | --- | --- |
| **CCL11** | GCAGGATTCCATGAAGTATC | AACACTCAGGCTCTGGTTTG | 91 |
| **CCL20** | GCTAAAAACCATGTGCTGTACC | GTAGCAGCACTGACATCAAAG | 62 |
| **CXCL5** | CTGCGTTGCGTTTGTTTACAG | TGGCGAACACTTGCAGATTAC | 72 |
| **CXCL8** | TCTAGGACAAGAGCCAGGAAG | GCTTGGAAGTCATGTTTACAC | 70 |
| **CXCL9** | CACCATCTCCCATGAAGAAAG | ACCAATCATGCTTCCACTAAC | 83 |
| **SELE** | TACAAGTCCTCTTGTGCCTTC | TGTCCATTGTCCCTGAGATG | 89 |
| **INFg** | CGGTTTGAAAATATGCCTGC | GTCACCTGACACATTCAAGTTC | 82 |
| **STAT1** | TTTGCTGTATGCCATCCTCG | TTAGGTGCCAAGACTGTCGAG | 61 |
| **IFIT3** | GCATAGGCAGTATTTTCCTGT C | TTTCCTCACTACCATCCTCAAG | 54 |
| **IL6** | CAAATTCGGTACATCCTCGAC | TGCCTCTTTGCTGCTTTCAC | 86 |
| **IL22** | TATCTGATGAAGCAGGTGCTG | GCACCACCTCCTGCATATAAG | 90 |
| **IL22RA2** | CCATGATGCCTAAACATTGC | TTCAGAGACTCATGCGTTGAC | 90 |
| **TNF** | AGCAACAAGACCACCACTTC | ATTCTTAGTGGTTGCCAGCAC | 80 |
| **MAPK1** | AGAGAACCCTGAGGGAGATAA | GGTGCTCGAATAATGTCATTG | 81 |
| **MMP9** | CACTACTGTGCCTTTGAGTC | CAATGGATAGGCTGAGCAAAC | 98 |
| **MMP3** | GGCATAGAGACAACATAGAGC | CAATGGATAGGCTGAGCAAAC | 98 |
| **TIMP1** | TTCTGGCATCCTGTTGTTGC | CTGATGACGAGGTCGGAATTG | 94 |
| **NOS2** | TTGCCTGGGGTCCATTATGAC | TCGATAGCTTGAGGTAGAAGC | 92 |
| **S100A8** | ATTTCCATGCCGTCTACAGG | GCACCCTTTTTCCTGATATAC | 78 |
| **LILRA3** | GGATGCACACTTTCCTTTTGAC | TTTTAGACGCAGCGGGGAATC | 59 |
| **LILRB2** | TCCAGTGTGAGTCACAGGTG | CAGGCATTGTGGGTGTTCATC | 76 |
| **LILRB3** | AAACAAAAACAGACGTAAA | TCAGCAGCCTTAACTTCTTG | 86 |
| **TGFb1** | GTTCTTCAACACATCAGAGC | CACTTTTAACTTGAGCCTCAG | 93 |
| **NOD2** | TCACTAGGCTTCTGGTTGATG | CCTCTTGTGGGTCTATTTCAG | 70 |
| **B-actin** | GGACTTCGAGCAAGAGATGG | CAGGCAGCTCGTAGCTCTTC | 67 |

**Supplemental Table 2**
